# Supplementary material
Source: PubMed Central journal article supplement (PMC4874711)
Supplement: rspb20160242supp1.pdf [file rspb20160242supp1.pdf]

## 1 **Supplementary Materials**

### 2 **1. Collection and Site Information**

3 Fish were collected from eleven populations from eight different lakes, rivers or  
4 lagoons (from now on referred to as *location*): two marine, three solitary and three  
5 species-pair locations (see Table S1 for details). The following collection permits were  
6 used: Species at risk act permit number SARA 236 and British Columbia fish collection  
7 permit number NA-SU12-76311. In order to measure opsin gene expression, six gravid  
8 females were collected from each of the populations. All fish from a given population  
9 were taken at the same time and the collections were taken between 10 am and 12 pm  
10 during the period of May 16<sup>th</sup> to May 30<sup>th</sup> 2012. Fish were euthanized at the site using  
11 buffered Tricaine methanesulfonate (MS-222). Both eyes were removed and  
12 immediately stored in 1 ml RNAlater® (Qiagen, Netherlands) and moved to a -20° C  
13 freezer for up to a month until RNA was extracted. Irradiance was measured in July  
14 2012.

15 Three families of Priest Benthic and three families of Oyster Marine fish were  
16 generated by *in vitro* fertilization in May and June 2012 respectively. These fish were  
17 hatched and reared in freshwater tanks under fluorescent lights on a 14 and 10 hour  
18 light-dark cycle. Animals were treated in accordance with University of British  
19 Columbia Animal Care protocols (Animal Care Permit # A11-0402). Gravid females  
20 were sacrificed using MS-222 between June 5<sup>th</sup> and 7<sup>th</sup> 2013. One fish from each family  
21 was surveyed (three fish per population). Both eyes were immediately removed and  
22 put directly into RNAlater®. Samples were stored in RNAlater® for one week at -20°C  
23 until RNA was extracted.

24

### 25 **2. RT-qPCR Protocol**

26 Left and right eyes were pooled for each individual. The pooled eyes were  
27 homogenized in a Retsch mm 400 Mixer Mill (Haan, Germany) using a carbide bead.  
28 Total RNA was extracted using the Aurum™ Total RNA Fatty and Fibrous Tissue  
29 (BioRad®), which included a DNase I incubation step. The concentration and purity of  
30 the extracted RNA was assessed on a NanoDrop® Spectrophotometer (Thermo  
31 Scientific). Synthesis of cDNA was accomplished using the iScript™ cDNA Synthesis  
32 Kit (Bio-Rad®); 1000 ng of RNA was used as the input for the cDNA synthesis of each

33 sample. The resulting cDNA was diluted 1:100 in ultra-pure water for RT-qPCR  
34 analysis.

35 RT-qPCR primers and probes were designed using sequences from the  
36 stickleback genome (See Table S2 for primer and probe sequences). Primer sequences  
37 were targeted to regions that were divergent between the five opsin gene subfamilies.  
38 Despite the fact the stickleback have two *RH2* genes the primers were designed to pick  
39 up only one of the duplicates because there is no evidence to suggest they would have  
40 different absorption phenotypes and there is some evidence to suggest that the non-  
41 targeted duplicate may be a pseudogene [1]. For each gene one of the primers and/or  
42 the RT-qPCR probe spanned an intron, this was done to avoid amplification of genomic  
43 DNA. We used the PrimeTime® qPCR 5' Nuclease Assays from Integrated DNA  
44 Technologies® (Iowa, USA) for each of the targeted genes. The assays used had a  
45 double-quenched probe with 5' 6-FAM™ dye, internal ZEN™ and 3' Iowa Black® FQ  
46 Quencher.

47 Quantification of gene transcript copy number was done using RT-qPCR analysis  
48 on a BioRad®IQ5 machine (BioRad, California USA). The polymerase used was the  
49 SsoFast probes supermix (BioRad®) in a 25 µl reaction. Reactions were run in 96-well  
50 plates (Fisher, Massachusetts USA), which were sealed using optical sealing tape  
51 (BioRad®). Well-factors were collected from each of the experimental plates. Reactions  
52 were run in duplicate or triplicate. No-reverse transcription and no template controls  
53 were included and for every run and did not amplify. RT-qPCR conditions consisted of  
54 1 cycle at 95 °C (3 minutes); 40 cycles of 95 °C (10 seconds) followed by 60 °C (30  
55 seconds). We used a standardized luminance threshold value of 50 to calculate CT  
56 values. Equation 1 was used to calculate the PCR efficiencies (E) for each of the primer  
57 pairs,

$$58 \quad E = e^{-slope} - 1, \quad (1)$$

59 where the slope is determined from a linear least squares regression fit to critical  
60 threshold (Ct) data from a cDNA dilution series (1:10, 1:50, 1:100, 1:500, 1:1000).

61 We calculated opsin expression relative to the *beta actin* reference gene,  
62 however for the purposes of this study we were more interested in the expression of  
63 each opsin gene relative to the total opsin levels present in the retina, rather than  
64 absolute levels of expression, so we used the proportion of total opsin expression for a  
65 given gene. The estimate of the initial amount of gene transcript ( $T_i$ ) was calculated for

66 each individual (*i*) using equation 2, where *E* is the PCR efficiency for a given gene  
67 calculated from equation 1 and  $C_t$  is the critical threshold for fluorescence.

$$68 \quad T_i = \frac{1}{(1+E)^{C_t}} \quad (2)$$

69 Then for each individual we summed the opsin gene expression across the four opsin  
70 genes and calculated the proportion of total expression that each gene exhibited.

71

72 Amplicons from the RT-qPCR for each gene (primer pair) were sequenced from  
73 one individual and are reported in Table S2. Sanger sequencing of the amplicons was  
74 done at the NAPS Sequencing Centre at the University of British Columbia.

75

### 76 **3. Deriving Spectral Sensitivity**

77 We used the absorbance templates for A1 chromophore (unless otherwise stated) for  
78 each of the four cone opsins from Govardovskii *et al.* [2] and the wavelengths of  
79 maximum absorbance ( $\lambda_{max}$ ) for each opsin from Flamarique *et al.* [3] The spectral  
80 sensitivity of an individual (*i*) at a given wavelength ( $\lambda$ ) for a particular opsin (*o*) is the  
81 multiplication of its absorbance ( $A_o(\lambda)$ ) and relative expression ( $E_{i,o}$ ). The overall  
82 sensitivity of an individual is the sum over of all opsins and is defined across the visible  
83 wavelength range (350 to 700 nm) by

84

$$85 \quad S_i(\lambda) = \sum_{0 < o < 5} A_o(\lambda) E_{i,o}.$$

86

### 87 **4. Plasticity in the Laboratory Environment**

88 To assess the effect of plasticity on opsin gene expression, we looked at the  
89 difference between wild and lab-reared fish derived from one marine and one  
90 freshwater location (Figure 4). While much of the differentiation in gene expression  
91 between marine and freshwater individuals was maintained in the lab, some plasticity  
92 was still seen; the level of *SWS1* (UV) expression was reduced in both types of lab  
93 reared fish relative to their wild counterparts (marine difference =  $0.16 \pm 0.04$  SE,  
94  $p=0.003$ ,  $F_{1,7}=19.9$ ; freshwater difference =  $0.06 \pm 0.02$  SE,  $p=0.007$ ,  $F_{1,7}= 14.3$ ) (Figure  
95 4). There was also a significant increase in *SWS2* (blue) expression for the lab-reared  
96 marine fish compared to wild individuals, although the effect size was small (difference  
97 =  $0.013 \pm 0.004$  SE,  $p=0.009$ ,  $F_{1,7}=12.9$ ) (Figure 4). However, this was not seen for the

98 freshwater population ( $p=0.2$ ) (Figure 4). There was not a significant difference in the  
99 *LWS* or *RH2* expression of wild and lab reared fish ( $p>0.09$ ) (Figure 4).

100 These results indicate that there is a small contribution of plasticity in  
101 stickleback opsin gene expression. Raising the fish under artificial (fluorescent) lighting  
102 that lacked UV wavelengths likely contributed to the reduction in *SWS1* expression that  
103 we saw in lab-reared fish. This same pattern has been previously described in cichlids,  
104 where lab-reared individuals raised under artificial lighting had reduced *SWS1*  
105 expression compared to wild caught fish [4].

106

## 107 **5. Association between differences in Spectral Sensitivity and Ambient Light**

108 We use two functions of wavelength ( $\lambda$ ) to characterize ambient light: the  
109 irradiance  $I_s(\lambda)$  and the transmission  $K_s(\lambda)$ , with the values of  $\lambda$  between 350 and 700  
110 nm. Recall from the main text that the irradiance is taken to be the irradiance measured  
111 at depth 50m. To construct  $K_s(\lambda)$  we use transmission coefficients, as defined by the  
112 Beer-Lambert law, which gives transmission  $T_s$  at depth ( $d$ ) and wavelength ( $\lambda$ ) as

$$113 \quad T_{s,d}(\lambda) = b(\lambda)e^{-K_s(\lambda)d}.$$

114 For each site and each value of  $\lambda$ , we estimated the unknown parameters  $b(\lambda)$  and  
115  $K_s(\lambda)$  using the *nls* function in R. We then smoothed the resulting  $K_s(\lambda)$  values using a  
116 rolling mean approach (as implemented in the R *zoo* library [5] with window width 10  
117 nm). For each site, these smoothed  $K_s(\lambda)$  values were then normalized to sum to 1, as  
118 we want to compare the difference in relative absorbance between different locations.  
119 Hereafter,  $K_s(\lambda)$  refers to the smoothed and normalized values of the site-specific  
120 transmission coefficients. For each location, we then constructed the ‘representative’  
121 transmission coefficient curve,  $\bar{K}_s(\lambda)$ , by calculating at each value of  $\lambda$  the median of the  
122  $K_s(\lambda)$ ’s from all sites within that location.

123 To quantify ambient light differences between freshwater and marine locations,  
124 we chose a reference marine location (A), and refer to its curve of transmission  
125 coefficients as  $\bar{K}_{s,A}(\lambda)$ . We then calculated the difference between the transmission  
126 coefficients for each freshwater location (B) that we wanted to test and the reference  
127 marine location (A) as  $\Delta K_s(\lambda) = -1(\bar{K}_{s,B}(\lambda) - \bar{K}_{s,A}(\lambda))$ . We multiplied the difference  
128 by -1 to facilitate the comparison between  $\Delta S_i$ ,  $\Delta K_s$  and  $\Delta I_s$  (see Supplementary Figure  
129 4). Note that, in our definition,  $\Delta K_s$  is a measure of light propagation (instead of rate of  
130 absorbance). A positive value of  $\Delta K_s(\lambda)$  indicates more transmission of light (*i.e.* fewer

131 photons are lost as light travels through water) at wavelength  $\lambda$  at the freshwater  
132 location  $B$  than at the reference marine location. For this analysis we used Oyster  
133 Lagoon as our marine reference location ( $A$ ). We repeated this procedure (without  
134 multiplying by -1) to calculate the difference between environments in irradiance ( $\Delta I_s$ ).  
135 Again for irradiance a positive value of  $\Delta I_s(\lambda)$  indicates that there are more photons  
136 present at wavelength  $\lambda$  at the freshwater location ( $B$ ) relative to the marine reference  
137 environment ( $A$ ).

138 To quantify differences in spectral sensitivity between each location  $B$  and the  
139 reference marine location  $A$ , at each wavelength  $\lambda$  we first calculated  $\bar{S}_A(\lambda)$  as the  
140 median of the spectral sensitivities of all measured individuals from the reference  
141 location  $A$ . For each individual  $i$  in location  $B$ , we calculated the difference between that  
142 individual's spectral sensitivity at each wavelength  $S_{i,B}(\lambda)$  and the marine location  $A$   
143 spectral sensitivity:  $\Delta S_{i,B}(\lambda) = S_{i,B}(\lambda) - \bar{S}_A(\lambda)$ .

144 We are now able to proceed with studying association between differences in  
145 spectral sensitivity and ambient light, using each fish's spectral sensitivity and its light  
146 environment (transmission and irradiance) at each wavelength, all measured relative  
147 to the reference marine location  $A$ . A scatterplot of spectral sensitivity difference  
148 against difference of light environment at all wavelengths allows us to visually assess  
149 the association between the two variables. To proceed with a statistical analysis, for  
150 each fish, we summarized and quantified this strength of association via the correlation  
151 coefficient ( $r$ ). If the correlation coefficient calculated for fish  $i$  is positive, then, for that  
152 fish, wavelengths showing elevated sensitivity (positive  $\Delta S_{i,B}(\lambda)$ 's) are associated with  
153 increased light propagation (higher transmission) in our transmission calculations and,  
154 in our irradiance calculations, are associated with more photons (higher irradiance).  
155 We calculated this association summary for every fish in location  $B$ . We tested whether  
156 the mean association (that is, the mean of the correlations in the population) in location  
157  $B$  was zero using a one-sample t-test. We did this for all locations. Our results are  
158 contained in Table S3 and reported in the main text. We also tested simultaneously the  
159 equality of the means of the individual level measures of association of all freshwater  
160 locations by fitting a mixed-effects model to the measure of association, with location  
161 as a random effect.

162 To study differences in environment (pelagic versus littoral) we carried out  
163 separate analyses for each of the two species pair lakes with data on light environment

164 (Paxton and Priest). For each lake, we took as reference the limnetic population, and  
165 thus the pelagic environment. Our calculations were the same as in the  
166 marine/freshwater comparison above, with the littoral environment (with benthic  
167 fish) being substituted for 'location B' in our calculations. Thus, in each lake, for each  
168 benthic fish, we considered the relationship between differences in its spectral  
169 sensitivity (relative to median limnetic sensitivity) and differences in light environment  
170 (relative to that lake's median – representative pelagic environment). We summarized  
171 that relationship for each benthic fish by the correlation and then tested whether these  
172 correlations were expected to equal to 0. The results did not differ greatly if the benthic  
173 population was used as the reference. See Table S4 for complete results, including  
174 those discussed in Supp. Mat. Section 6.

175

## 176 **6. Effect of Changing Chromophore or Reference Population in the Analyses of** 177 **Differences in Sensitivity and Differences in Light Environment**

178 Recall that, in our initial analyses (reported in the main text), spectral sensitivity was  
179 modeled using exclusively the A1 chromophore. Our reference population for the  
180 marine-freshwater comparison was Oyster Lagoon and our reference population for  
181 the species pair analysis was the limnetic population. We studied the robustness of our  
182 results to using different chromophores and different reference populations.

183

184 To study the importance of the reference location in the marine/freshwater  
185 comparison, we first made a direct comparison of Oyster Lagoon and the other marine  
186 location, Little Campbell River, using Oyster Lagoon as reference. That is, Oyster Bay  
187 served as "A" and Little Campbell River served as "B" in the analysis in Supp. Mat.  
188 Section 5. We found that there was no significant association between differences in  
189 sensitivity and differences in transmission (data not shown), but there was a significant  
190 association for the irradiance. In other words, changes in sensitivity in Little Campbell  
191 relative to the reference Oyster Lagoon population did not significantly covary with  
192 changes in transmission but did significantly covary with changes in irradiance. Thus,  
193 we might infer that Little Campbell River and Oyster Lagoon are equivalent reference  
194 populations for transmission analysis, but perhaps not for irradiance analysis.

195

196 In order to further study whether reference population affected the results we re-did  
197 the analysis, described in the main text and in Supp. Mat. Section 5, using Little  
198 Campbell River instead of Oyster Lagoon as the marine reference (Supplementary  
199 Figure 1A and B). The results are given in Table S3. Overall the results with the two  
200 base lines agree; the mean correlations and significance levels are very similar for  
201 transmission. When the A1 chromophore is used for estimation of sensitivity the  
202 correlation for irradiance is also similar, however when other chromophores are used  
203 the correlation becomes significantly negative. We believe that Little Campbell River is  
204 a much less reliable marine reference population because the measurements were  
205 taken in the tidal (marine) part of the river where turbidity increases significantly  
206 when the tide comes in. The light measurements were taken with incoming tide and  
207 hence may give a biased view of the light environment the stickleback experience most  
208 of the time, and this may explain the odd result for irradiance.

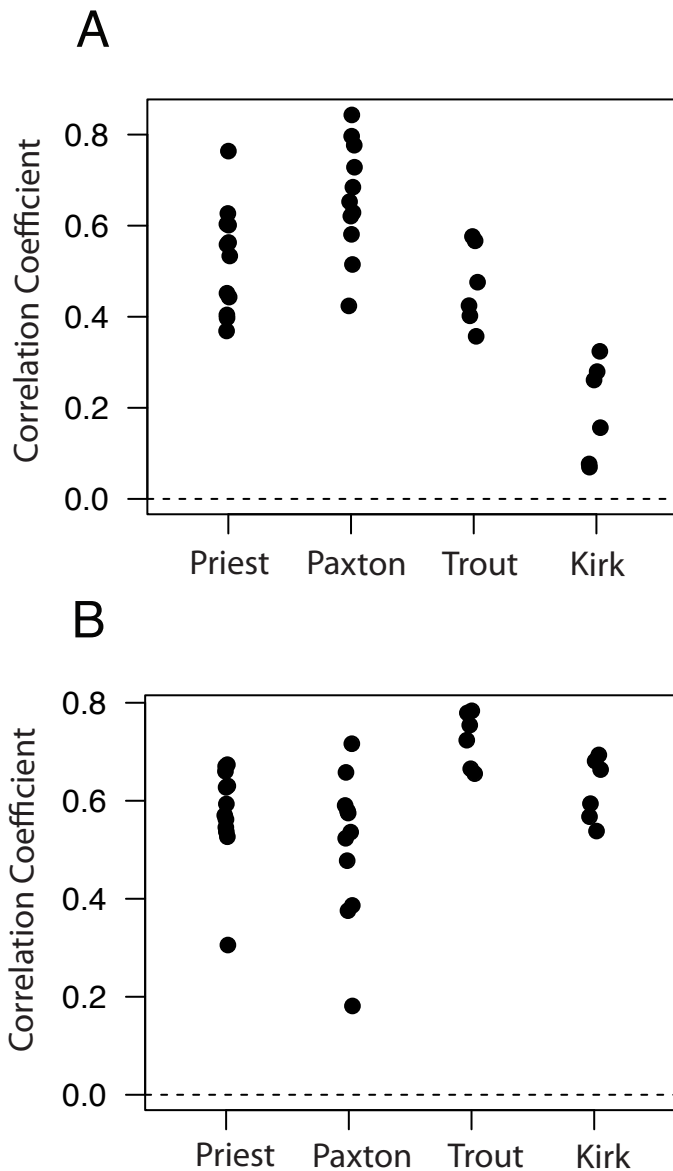

209  
 210 Supplementary Figure 1. Quantification of correlation between differences in spectral  
 211 sensitivity and differences in local light transmission (A) and irradiance (B) for marine  
 212 and freshwater populations. Circles indicate individuals' correlations. All populations  
 213 are presented relative to the marine reference location, Little Campbell River.

214  
 215 To determine the importance of the reference population in the analyses for the  
 216 two species pair locations (Priest and Paxton), we repeated the analysis using the  
 217 benthic ecotype as reference instead of the limnetic. For all chromophore combinations  
 218 the results are very similar to those obtained using the limnetics as a reference for both  
 219 transmission (Supplementary Figures 2 and Table S4).



220

221

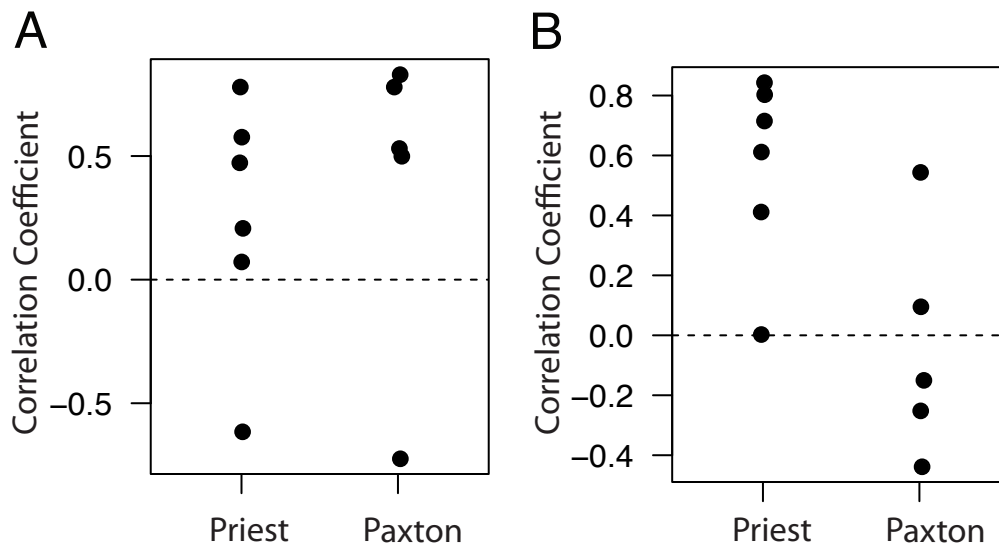

222

223 Supplementary Figure 2. Quantification of correlation between differences in spectral  
224 sensitivity and differences in local light transmission (A) and Irradiance (B) for benthic  
225 and limnetic populations. Circles indicate individuals' correlations, using the benthics  
226 as reference population.

227

## 228 **7. Effect of Changing Chromophore in the Analysis of the Correlation Between** 229 **Spectral Sensitivity and Ambient Light (Spectral Matching).**

230

231 To study the effect of chromophore on our spectral matching results, we  
232 repeated the analysis reported in the main text with various different chromophore  
233 combinations in the freshwater population. The combinations and the results are  
234 presented in Table S5. Switching the ratio of chromophore used did little to affect the  
235 magnitude of the correlation between spectral sensitivity and Transmission. However  
236 the magnitude of the correlation strengthened for irradiance when there was a 50:50  
237 mix of  $A_1$  and  $A_2$  used.

238

239 **8. Supplementary Figures and Tables**

240

241 Table S1. Stickleback populations used, their locations, and sample sizes (# of fish) for  
 242 opsin expression and environmental light conditions (irradiance) for shallow ( $\leq 6m$ )  
 243 and deep ( $> 6m$ ) sampling sites.

244

| Name                  | Latitude | Longitude  | Type         | Sample Size | Irradiance (# of sites) |               |   |
|-----------------------|----------|------------|--------------|-------------|-------------------------|---------------|---|
|                       |          |            |              |             | $\leq 6m$               | $> 6m$        |   |
| Oyster Bay            | 49.61210 | -124.03186 | Marine       | 6           | 10                      | 0             |   |
| Little Campbell River | 49.01543 | -122.77662 | Marine       | 6           | 10                      | 0             |   |
| Trout Lake            | 49.50820 | -123.87641 | Solitary     | 6           | 10                      | 5             |   |
| Cranby Lake           | 49.69537 | -124.50812 | Solitary     | 6           | <i>failed</i>           |               |   |
| Kirk Lake             | 49.73897 | -124.58680 | Solitary     | 6           | 7                       | 5             |   |
| Paxton Lake           | 49.70789 | -124.52492 | Species-pair | Benthic     | 6                       | 10            | 5 |
|                       |          |            |              | Limnetic    | 6                       |               |   |
| Priest Lake           | 49.74517 | -124.56519 | Species-pair | Benthic     | 6                       | 10            | 5 |
|                       |          |            |              | Limnetic    | 5                       |               |   |
| Little Quarry Lake    | 49.66266 | -124.10888 | Species-pair | Benthic     | 6                       | <i>failed</i> |   |
|                       |          |            |              | Limnetic    | 6                       |               |   |

245

246

247

248

249

250

251

252

253

254

255

256

257 Table S2.

258 Primer, probe and amplicon sequences from RT-qPCR assays.

| Gene         | Probe Sequence<br>5'-3'    | Primer Sequences<br>5'-3'                                                    | Amplicon<br>Size (bp) | RT-qPCR Amplicon Sequence                                                                                                                                                                                                                                                            |
|--------------|----------------------------|------------------------------------------------------------------------------|-----------------------|--------------------------------------------------------------------------------------------------------------------------------------------------------------------------------------------------------------------------------------------------------------------------------------|
| <i>SWS1</i>  | CCGTAGCAGGAC<br>TGGTGACAGC | Forward:<br>ACATCACCTTGGC<br>AGGATTC<br>Reverse:<br>GTGGGCTGGAACA<br>ACAGATT | 279                   | GGTGTTCGTCGCATCTGCCA<br>GGGGTTACTACTTCCTGGGT<br>TACACCTTGTGCGCGCTGGAG<br>GCTGCGATGGGATCCGTAGC<br>AGGACTGGTGACAGCCTGGT<br>CTTTGGCTGTTTTGTCTTTTCG<br>AGAGATATCTGATCATCTGT<br>AAACCTTTTGGAGCCTTTAA<br>GTTTACCAGTAACCACGCTCT<br>CGGTGCTGTCGCCTTACCTG<br>GTTTATGGGAATCTGTTGTT<br>CCAGCCCA |
| <i>SWS2A</i> | GAAAATGGCGGC<br>AAAGGCC    | Forward:<br>TCTGCACAATTTG<br>CTTCTGC<br>Reverse:<br>GGTTGTAAACTGC<br>GGAGGAC | 261                   | GGCGGCAAGGCCCAAGCAGA<br>ATCCGCCTCGACCCAGAAGGC<br>GGAGCGGGAGGTGACCAGGA<br>TGGTGGTTCTCATGGTGATG<br>GGCTTCCTGGTGTGCTGGAT<br>GCCGTACGCCTCATTGCTCT<br>TTGGTGGTCAACAACCGCG<br>GGCAGACTTTTGACCTGAGG<br>TTTGCTTCTATTCCGTCCGTC<br>TTTTCCAAGTCCCTCCGAGTT<br>TACAAC                             |
| <i>RH2</i>   | TTGGCTGGTCCA<br>GGTACCTTCC | Forward:<br>GGGATTCATGGCC<br>ACATTAG<br>Reverse:<br>TAGTCAGGTCCAC<br>ACGAGCA | 174                   | CTGGATCCTTTTCCCTGGACC<br>ATGGCTATGGCATGTGCTGC<br>TCCCCCTCTTTTGGTGGCCA<br>GGTACCTTCCCTGAGGGCATGC<br>AGTGCTCGTGTGGACCTGA                                                                                                                                                               |
| <i>LWS</i>   | TGGATGGAGCAG<br>GTA CTGGCC | Forward:<br>GATATGGTCTGCC                                                    | 297                   | TGGAAGTGAAGACCCTGGAG<br>TCCAGTCTACATGATTGTTC                                                                                                                                                                                                                                         |

|                   |                          |                                                                              |     |                                                                                                                                                                                                                                                                                                                                                                 |
|-------------------|--------------------------|------------------------------------------------------------------------------|-----|-----------------------------------------------------------------------------------------------------------------------------------------------------------------------------------------------------------------------------------------------------------------------------------------------------------------------------------------------------------------|
|                   |                          | GTCTGGT<br>Reverse:<br>GCCACAATCATGA<br>CAACGAC                              |     | TCATGATCACATGCTGTCTCA<br>TTCCTCTGGCCATCATCATAT<br>TGTGCTACCTTGCAGTCTGGT<br>TGGCTATCCGTGCTGTGGCCA<br>TGCAGCAGAAGGAATCAGAG<br>TCAACTCAAAAAGCTGAAAG<br>AGACGTATCCAGAATGGTCCG<br>TTGTCATGATTGTGGC                                                                                                                                                                   |
| <i>Beta Actin</i> | CTGTGCTACGTC<br>GCCCTGGA | Forward:<br>GGCTACTCCTTCA<br>CCACCAC<br>Reverse:<br>CAGGACTCCATAC<br>CGAGGAA | 329 | CACAGCTGAGAGGGAAATCG<br>TGCGTGACATCAAGGAGAAG<br>CTGTGCTACGTGCCCCTGGAC<br>TTCGAGCAGGAGATGGGTAC<br>CGCTGCCTCCTCCTCCTCCT<br>GGAGAAGAGCTACGAGCTGC<br>CCGACGGACAGGTCATCACCA<br>TCGGCAATGAGAGGTTCCGT<br>TGCCCAGAGGCCCTCTTCCAG<br>CCTTCCTCCTCGGTACGTTT<br>CCCTACTCGAGCCTAACAGTC<br>TCATAATGTAAATATGTTGC<br>TCCCTTGGTTACTCTGCACCG<br>CCACATGCTTACAAGTGTC<br>TCTCCCCTCAG |

259

260

261

262 Table S3. Mean correlation between the change in spectral sensitivity and the shift in  
 263 ambient light from marine to fresh water under various chromophore scenarios. O.L.  
 264 (Oyster Lagoon) and L.C.R. (Little Campbell River) are alternative reference marine  
 265 populations. Means that are significantly different from 0 are in bold.

266

| Reference Population | Ambient Light Measure | Chromophore |       | Mean Corr.  | SE   | <i>t</i> | Raw p-value | Adjusted p-value |
|----------------------|-----------------------|-------------|-------|-------------|------|----------|-------------|------------------|
|                      |                       | Marine      | Fresh |             |      |          |             |                  |
| O.L.                 | Transmission          | A1          | A1    | <b>0.39</b> | 0.12 | 3.30     | 0.002       | 0.004            |

|        |              |    |                |              |      |       |          |          |
|--------|--------------|----|----------------|--------------|------|-------|----------|----------|
| L.C.R. | Transmission | A1 | A1             | <b>0.46</b>  | 0.10 | 4.76  | < 0.0001 | < 0.0001 |
| O.L.   | Transmission | A1 | A2             | 0.14         | 0.09 | 1.53  | 0.136    | 0.148    |
| L.C.R. | Transmission | A1 | A2             | <b>0.26</b>  | 0.07 | 3.91  | 0.001    | 0.001    |
| O.L.   | Transmission | A1 | 50:50<br>A1/A2 | 0.22         | 0.12 | 1.85  | 0.074    | 0.088    |
| L.C.R. | Transmission | A1 | 50:50<br>A1/A2 | <b>0.55</b>  | 0.09 | 6.19  | < 0.0001 | < 0.0001 |
| O.L.   | Irradiance   | A1 | A1             | <b>0.32</b>  | 0.07 | 4.94  | < 0.0001 | < 0.0001 |
| L.C.R. | Irradiance   | A1 | A1             | <b>0.6</b>   | 0.05 | 13.3  | < 0.0001 | < 0.0001 |
| O.L.   | Irradiance   | A1 | A2             | <b>-0.32</b> | 0.12 | -2.74 | 0.010    | 0.015    |
| L.C.R. | Irradiance   | A1 | A2             | <b>-0.48</b> | 0.05 | -9.29 | < 0.0001 | < 0.0001 |
| O.L.   | Irradiance   | A1 | 50:50<br>A1/A2 | <b>-0.23</b> | 0.10 | -2.15 | 0.039    | 0.052    |
| L.C.R. | Irradiance   | A1 | 50:50<br>A1/A2 | -0.13        | 0.09 | -1.41 | 0.168    | 0.168    |

267

268 Table S4. Mean correlation between the change in spectral sensitivity and shift in  
269 ambient light, from limnetic to benthic environment (limnetic reference), and from  
270 benthic to limnetic environment (benthic reference).

271

| Reference Group | Ambient Light Measure | Chromophore | Mean Corr. | SE   | <i>t</i> | Raw p-value | Adjusted p-value |
|-----------------|-----------------------|-------------|------------|------|----------|-------------|------------------|
| Limnetic        | Transmission          | A1          | 0.27       | 0.13 | 1.97     | 0.077       | 0.185            |
| Benthic         | Transmission          | A1          | 0.31       | 0.16 | 1.91     | 0.088       | 0.185            |
| Limnetic        | Transmission          | A2          | 0.30       | 0.15 | 1.99     | 0.075       | 0.185            |
| Benthic         | Transmission          | A2          | 0.34       | 0.18 | 1.88     | 0.093       | 0.185            |
| Limnetic        | Transmission          | 50:50 A1/A2 | 0.28       | 0.15 | 1.92     | 0.084       | 0.185            |
| Benthic         | Transmission          | 50:50 A1/A2 | 0.33       | 0.17 | 1.88     | 0.094       | 0.185            |
| Limnetic        | Irradiance            | A1          | 0.18       | 0.18 | 1.00     | 0.339       | 0.581            |
| Benthic         | Irradiance            | A1          | 0.27       | 0.30 | 0.87     | 0.402       | 0.603            |
| Limnetic        | Irradiance            | A2          | 0.04       | 0.14 | 0.29     | 0.775       | 0.775            |
| Benthic         | Irradiance            | A2          | 0.08       | 0.24 | 0.35     | 0.735       | 0.775            |
| Limnetic        | Irradiance            | 50:50 A1/A2 | 0.11       | 0.17 | 0.63     | 0.539       | 0.696            |
| Benthic         | Irradiance            | 50:50 A1/A2 | 0.18       | 0.31 | 0.57     | 0.580       | 0.696            |

272

273

274 Table S5. Mean correlation between spectral sensitivity and local light environment  
 275 (measured as transmission and irradiance) under various chromophore scenarios.  
 276 Means that are significantly different from 0 are in bold.

| Population Type | Water Type | Ambient Light Measure | Chromophore | Mean Corr.   | SE   | p-value  | Adjusted p-value |
|-----------------|------------|-----------------------|-------------|--------------|------|----------|------------------|
| Fresh           | Fresh      | Transmission          | A1          | <b>0.07</b>  | 0.03 | 0.0184   | 0.029            |
| Fresh           | Fresh      | Transmission          | 50:50 A1/A2 | 0.04         | 0.04 | 0.2983   | 0.341            |
| Fresh           | Fresh      | Transmission          | A2          | -0.04        | 0.04 | 0.3859   | 0.386            |
| Fresh           | Fresh      | Irradiance            | A1          | <b>0.12</b>  | 0.02 | < 0.0001 | 0.0002           |
| Fresh           | Fresh      | Irradiance            | 50:50 A1/A2 | <b>0.15</b>  | 0.02 | < 0.0001 | 0.0002           |
| Fresh           | Fresh      | Irradiance            | A2          | <b>0.09</b>  | 0.03 | < 0.0001 | 0.0002           |
| Marine          | Marine     | Transmission          | A1          | <b>-0.66</b> | 0.11 | 0.0017   | 0.003            |
| Marine          | Marine     | Irradiance            | A1          | <b>-0.16</b> | 0.05 | 0.0230   | 0.031            |

277

278

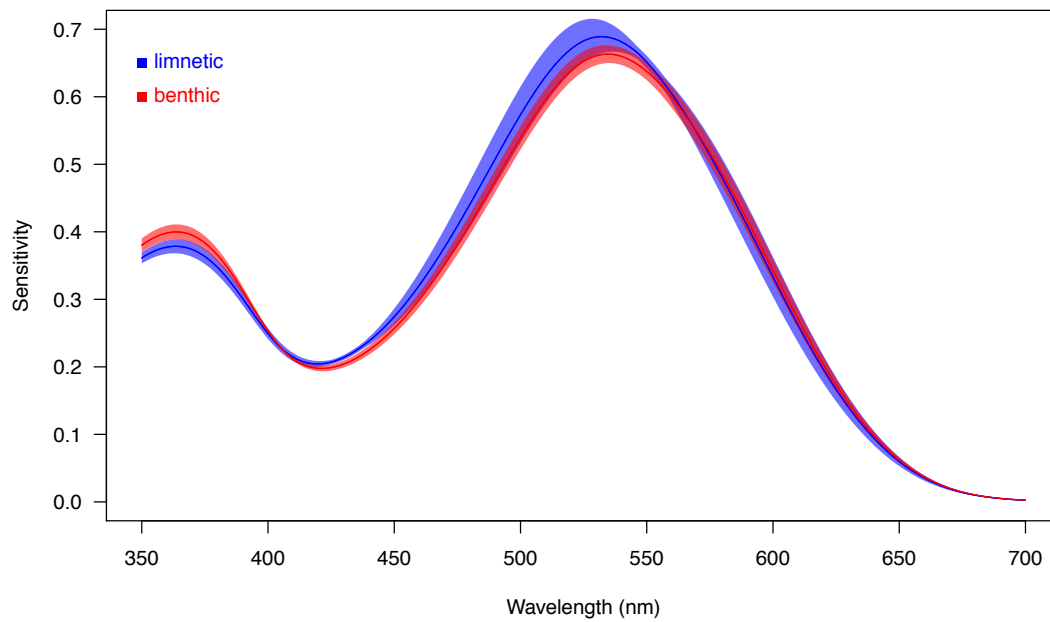

280

281 Supplementary Figure 3. Estimated mean spectral sensitivity of benthic (red) and  
282 limnetic (blue) populations. The center lines are the fitted values of spectral sensitivity  
283 from the mixed effects model. The shaded regions are one standard error above and  
284 below the fitted values, with standard errors also derived from the mixed-effects  
285 model.

286

287

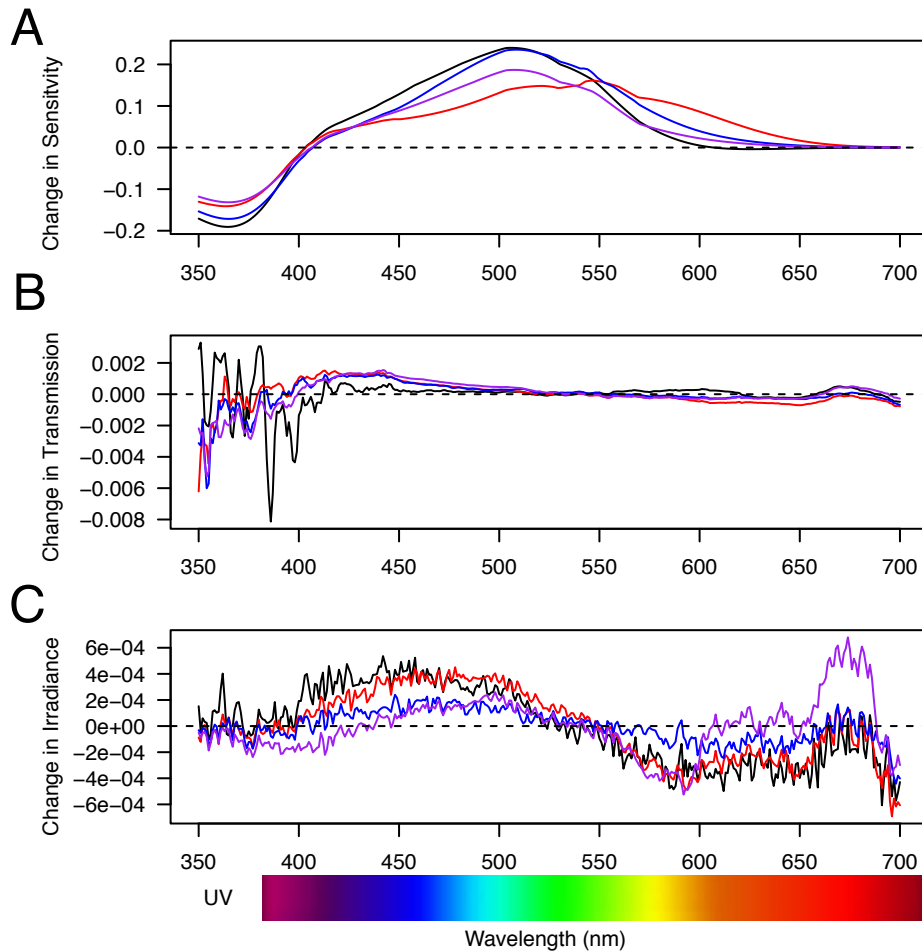

288  
 289 Supplementary Figure 4. Each subplot depicts the change in (A) spectral sensitivity  
 290 ( $\Delta S$ ), (B) transmission ( $\Delta K_s$ ), and (C) irradiance ( $\Delta I_s$ ), of four freshwater populations  
 291 (Kirk, Paxton, Priest and Trout) relative to the reference marine population (Oyster  
 292 Lagoon). Each population is labelled with a unique colour that is consistent among the  
 293 three panels. Positive values indicate those wavelengths for which the freshwater  
 294 populations have higher sensitivity, transmission or irradiance, than the marine  
 295 reference population, and negative values indicate wavelengths for which the  
 296 freshwater population has lower sensitivity, transmission or irradiance.

297  
 298 **Supplementary Materials References:**

299 1. Rennison DJ, Owens GL, Taylor JS. 2012 Opsin gene duplication and divergence in  
 300 ray-finned fish. *Mol. Phylogenet. Evol.* **62**, 986 – 1008.



- 301 2. Govardovskii VI, Fyhrquist N, Reuter TOM, Kuzmin DG, Donner K. 2000 In search of  
302 the visual pigment template. *Visual Neurosci.* **17**, 509 – 528.
- 303 3. Flamarique IN, Cheng CL, Bergstrom C, Reimchen TE. 2013 Pronounced heritable  
304 variation and limited phenotypic plasticity in visual pigments and opsin expression of  
305 threespine stickleback photoreceptors. *J. Exp. Biol.* **216**, 656 – 667.
- 306 4. Hofmann CM, O'Quin KE, Smith AR, Carleton KL. 2010 Plasticity of opsin gene  
307 expression in cichlids from Lake Malawi. *Mol. Ecol.* **19**, 2064 – 2074.
- 308 5. Zeileeis A, Grothendieck G. 2005 Zoo: S3 Infrastructure for regular and irregular time  
309 series. *J. Stat. Softw.* **14**, 1 – 27.
- 310
- 311
